# Supplementary material for: CoCStom trial: study protocol for a randomised trial comparing completeness of adjuvant chemotherapy after early versus late diverting stoma closure in low anterior resection for rectal cancer
Source: Springer Nature journal article supplement (doi:10.1186/s12885-015-1838-0), 2015-11-20
Supplement: MOESM1 [file 9745456]

**Additional file 1.**

**Example of visits and documented parameters for chemotherapy regimen with eight cycles. Arm A.**

| Group A:<br>Early closure              | CH: V1         | CH: V2             |                    | CH: V3             |                     |                     |          | ONK: V4                    | ONK:<br>V5                   |
|----------------------------------------|----------------|--------------------|--------------------|--------------------|---------------------|---------------------|----------|----------------------------|------------------------------|
|                                        | Screening      | Stoma closure      |                    | Day of discharge   |                     |                     |          | CTx<br>cy 1<br>4-12 W*     | CTx<br>cy 2                  |
| Demographic and clinical baseline data | X              |                    |                    |                    |                     |                     |          |                            |                              |
| Inclusion/exclusion                    | X              |                    |                    |                    |                     |                     |          |                            |                              |
| QoL                                    | X              |                    |                    |                    |                     |                     | X        |                            |                              |
| Randomisation                          | X              |                    |                    |                    |                     |                     |          |                            |                              |
| <b>Intervention</b>                    |                | X                  |                    |                    |                     |                     |          |                            |                              |
| Secondary endpoints                    |                | X                  |                    | X                  |                     |                     |          | X                          | X                            |
|                                        | <b>ONK: V6</b> | <b>ONK:<br/>V7</b> | <b>ONK:<br/>V8</b> | <b>ONK:<br/>V9</b> | <b>ONK:<br/>V10</b> | <b>ONK:<br/>V11</b> | <b>K</b> | <b>CH: V12</b>             | <b>CH: V13</b>               |
|                                        | CTx<br>cy 3    | CTx<br>cy 4        | CTx<br>cy 5        | CTx<br>cy 6        | CTx<br>cy7          | CTx<br>cy 8         |          | End of<br>therapy<br>28 W* | End of<br>follow-up<br>24 M* |
| <b>CoC(prim. endpoint)</b>             |                |                    |                    |                    |                     |                     |          | X                          |                              |
| QoL                                    |                |                    | X                  |                    |                     |                     | X        | X                          | X                            |
| Secondary endpoints                    | X              | X                  | X                  | X                  | X                   | X                   | X        | X                          | X                            |

d: day; M: months; W: weeks; CoC: completeness of chemotherapy; CTx: chemotherapy; cy: cycle; \* after randomisation, QoL: Quality of Life;

**CH: V:** visits in surgical department, **ONK: V:** visits in oncological department;

**K:** assessment of QoL at control visit (completion of the questionnaire ~4 weeks after application of the last CTx dose: hand out questionnaire at control visit or by mail).
