# Supplementary material for: CoCStom trial: study protocol for a randomised trial comparing completeness of adjuvant chemotherapy after early versus late diverting stoma closure in low anterior resection for rectal cancer
Source: Springer Nature journal article supplement (doi:10.1186/s12885-015-1838-0), 2015-11-20
Supplement: MOESM2 [file 9745456]

## Additional file 2.

### Example of visits and documented parameters for chemotherapy regimen with eight cycles. Arm B.

|                                        |                    |                    |                    |          |                        |                     |                            |                               |                    |
|----------------------------------------|--------------------|--------------------|--------------------|----------|------------------------|---------------------|----------------------------|-------------------------------|--------------------|
| <b>Group B:<br/>Late closure</b>       | <b>CH: V1</b>      |                    |                    |          | <b>ONK: V2</b>         | <b>ONK:<br/>V3</b>  | <b>ONK:<br/>V4</b>         | <b>ONK:<br/>V5</b>            | <b>ONK:<br/>V6</b> |
|                                        | Screening          |                    |                    |          | CTx<br>cy 1<br>4-12 W* | CTx<br>cy 2         | CTx<br>cy 3                | CTx<br>cy 4                   | CTx<br>cy 5        |
| Demographic and clinical baseline data | X                  |                    |                    |          |                        |                     |                            |                               |                    |
| Inclusion/exclusion                    | X                  |                    |                    |          |                        |                     |                            |                               |                    |
| QoL                                    | X                  |                    |                    |          | X                      |                     |                            |                               | X                  |
| Randomisation                          | X                  |                    |                    |          |                        |                     |                            |                               |                    |
| Secondary endpoints                    |                    |                    |                    |          | X                      | X                   | X                          | X                             | X                  |
|                                        | <b>ONK:<br/>V7</b> | <b>ONK:<br/>V8</b> | <b>ONK:<br/>V9</b> | <b>K</b> | <b>CH: V10</b>         | <b>CH: V11</b>      | <b>CH: V12</b>             | <b>CH: V13</b>                |                    |
|                                        | CTx<br>cy 6        | CTx<br>cy 7        | CTx<br>cy 8        |          | Stoma<br>closure       | Day of<br>Discharge | End of<br>therapy<br>28 W* | End of follow-<br>up<br>24 M* |                    |
| <b>Intervention</b>                    |                    |                    |                    |          | X                      |                     |                            |                               |                    |
| <b>CoC(prim. endpoint)</b>             |                    |                    |                    |          |                        |                     | X                          |                               |                    |
| QoL                                    |                    |                    |                    | X        |                        |                     | X                          | X                             |                    |
| Secondary endpoints                    | X                  | X                  | X                  |          | X                      | X                   | X                          | X                             |                    |

d: day; M: months; W: weeks; CoC: completeness of chemotherapy; CTx: chemotherapy; cy: cycle; \* after randomisation, QoL: Quality of Life;

**CH: V:** visits in surgical department, **ONK: V:** visits in oncological department;

**K:** assessment of QoL at control visit (completion of the questionnaire ~4 weeks after application of the last CTx dose: hand out questionnaire at control visit or by mail)
