# Supplementary material for: CoCStom trial: study protocol for a randomised trial comparing completeness of adjuvant chemotherapy after early versus late diverting stoma closure in low anterior resection for rectal cancer
Source: Springer Nature journal article supplement (doi:10.1186/s12885-015-1838-0), 2015-11-20
Supplement: MOESM3 [file 9745456]

### Additional file 3.

#### Definitions of secondary outcomes

| Secondary outcomes                                                                        | definition                                                                                                                                                                                                                                                                                                                                                                                                                                                                                                                                                                                                                                                                                                                                                                                                                                                                              |
|-------------------------------------------------------------------------------------------|-----------------------------------------------------------------------------------------------------------------------------------------------------------------------------------------------------------------------------------------------------------------------------------------------------------------------------------------------------------------------------------------------------------------------------------------------------------------------------------------------------------------------------------------------------------------------------------------------------------------------------------------------------------------------------------------------------------------------------------------------------------------------------------------------------------------------------------------------------------------------------------------|
| Changes in QoL up to 24 months after randomisation                                        | QoL baseline will be measured at randomisation (visit 1). Additionally it will be assessed for <b>group A (early closure)</b> at visit 4; at visit 6 or 8 (dependent on cycles number of each regimen: 4, 5 or 8 cycles); at control visit after visit 7, 8 or 11 (dependent on cycles number of each regimen: 4, 5 or 8 cycles) and at visit 12 and 13. For <b>group B (late closure)</b> QoL will be additionally assessed at visit 2; at visit 4 or 6 (dependent on cycles number of each regimen: 4, 5 or 8 cycles); at control visit after visit 5, 6 or 9 (dependent on cycles number of each regimen: 4, 5 or 8 cycles), and at visits 12 and 13. To determine QoL the EORTC QLQ-C30 and the CR 29 self-administered questionnaires, both validated in German, will be used. The specific items of interest are overall quality of life and those items related to stoma issues. |
| Stoma-related complications                                                               | Rate of stoma-related complications is defined as the percentage of patients developing stoma-related complications in relation to all patients with stoma.                                                                                                                                                                                                                                                                                                                                                                                                                                                                                                                                                                                                                                                                                                                             |
| Individual CoC rate                                                                       | Individual CoC rate is the proportion of completed chemotherapy cycles calculated for each patient in relation to the planned number of cycles, determined 7 months after randomisation.                                                                                                                                                                                                                                                                                                                                                                                                                                                                                                                                                                                                                                                                                                |
| Percentage of patients stopping adjuvant therapy or undergoing dose modification or delay | Dose modification or delay measured 7 months after randomisation and defined as the proportion of randomised patients receiving a dose modification or delay in relation to the total number of randomised patients.                                                                                                                                                                                                                                                                                                                                                                                                                                                                                                                                                                                                                                                                    |
| Toxicity of adjuvant chemotherapy per cycle                                               | Toxicity of adjuvant chemotherapy will be assessed, per cycle, according to NCI-CTCAE v.4.03 criteria [1].                                                                                                                                                                                                                                                                                                                                                                                                                                                                                                                                                                                                                                                                                                                                                                              |
| Disease free survival                                                                     | Disease-free survival, determined from the date of randomisation to the date of diagnosis of recurrence or death during the 24 months follow-up period.                                                                                                                                                                                                                                                                                                                                                                                                                                                                                                                                                                                                                                                                                                                                 |
| Local and distant recurrence-free survival                                                | Local recurrence-free survival and distant recurrence-free survival, determined from the date of randomisation to the date of the respective recurrence event or death during the 24 months follow-up period.                                                                                                                                                                                                                                                                                                                                                                                                                                                                                                                                                                                                                                                                           |

|                                                                                                            |                                                                                                                                                                                                                                                                                                                                              |
|------------------------------------------------------------------------------------------------------------|----------------------------------------------------------------------------------------------------------------------------------------------------------------------------------------------------------------------------------------------------------------------------------------------------------------------------------------------|
| Rate of symptomatic anastomotic leaks after stoma closure                                                  | Rate of symptomatic rectal anastomotic leaks (according to consensus definition)[2] is defined as the proportion of anastomotic leakages clinically symptomatic in relation to the total number of stoma closures within 30 days after the procedure.                                                                                        |
| Mortality                                                                                                  | Mortality is determined from the date of randomisation to the date of death during 24 months follow-up period.                                                                                                                                                                                                                               |
| Postoperative complications (Clavien-Dindo Classification Grade 3 and 4 [3])                               | Number of re-operations is defined as the number of additional operations performed because of complications related to the stoma itself or the stoma closure procedure.                                                                                                                                                                     |
| Estimation of economic impact by analysis of cumulative days of hospitalisation and number of readmissions | Cumulative days of hospitalisation are defined as the additional days in hospital over a period of 28 weeks after randomisation. Cumulative readmissions are defined as the number of readmissions due to complications related to the stoma closure operation or stoma-related complications over a period of 28 weeks after randomisation. |

1. National Institutes of Health. NCI-CTCAE, v4.03. 2010.  
[http://evs.nci.nih.gov/ftp1/CTCAE/CTCAE\\_4.03\\_2010-06-14\\_QuickReference\\_8.5x11.pdf](http://evs.nci.nih.gov/ftp1/CTCAE/CTCAE_4.03_2010-06-14_QuickReference_8.5x11.pdf). Accessed 01 Aug 2015.
2. Rahbari NN, Weitz J, Hohenberger W, Heald RJ, Moran B, Ulrich A, Holm T, Wong WD, Tiret E, Moriya Y *et al*. Definition and grading of anastomotic leakage following anterior resection of the rectum: a proposal by the International Study Group of Rectal Cancer. *Surgery*. 2011;147(3):339-351.
3. Dindo D, Demartines N, Clavien PA. Classification of surgical complications: a new proposal with evaluation in a cohort of 6336 patients and results of a survey. *Ann Surg*. 2004; 240(2):205-213.
