# Supplementary material for: CoCStom trial: study protocol for a randomised trial comparing completeness of adjuvant chemotherapy after early versus late diverting stoma closure in low anterior resection for rectal cancer
Source: Springer Nature journal article supplement (doi:10.1186/s12885-015-1838-0), 2015-11-20
Supplement: MOESM4 [file 9745456]

#### **Additional file 4**

##### **List of ethics committees which approved the study protocol**

|    |                                                                                                                                     |
|----|-------------------------------------------------------------------------------------------------------------------------------------|
| 1  | Ethics Committee II of the Medical Faculty of Mannheim / University of Heidelberg                                                   |
| 2  | Ethics Committee of the Technical University Dresden                                                                                |
| 3  | Ethics Committee of the Saarland State Chamber of Physicians                                                                        |
| 4  | Ethics Committee of the University of Lübeck                                                                                        |
| 5  | Ethics Committee of the Hamburg Chamber of Physicians                                                                               |
| 6  | Ethics Committee of the Medical Faculty of the University of Greifswald                                                             |
| 7  | Ethics Committee of the Medical Faculty of the University of Heidelberg                                                             |
| 8  | Ethics Committee of the Ludwig-Maximilians-University of Munich                                                                     |
| 9  | Ethics Committee of the Medical Association North-Rhine                                                                             |
| 10 | Ethics-Commission of the Medical Center-University of Freiburg                                                                      |
| 11 | Ethics Committee of the Medical Faculty of the Eberhard-Karls-University and the University Hospital Tübingen                       |
| 12 | Ethics Committee of the Ulm University                                                                                              |
| 13 | Ethics Committee of the Medical Association Westphalia Lippe and the Medical Faculty of the Westphalian Wilhelms-University Münster |
| 14 | Ethics Committee of the Witten/Herdecke University                                                                                  |
| 15 | Ethics Committee of the State Chamber of Physicians Baden-Wuerttemberg                                                              |
| 16 | Ethics Committee of the Bavarian State Chamber of Physicians                                                                        |
| 17 | Ethics Committee of the State Chamber of Physicians Brandenburg                                                                     |
| 18 | Ethics Committee of the Chamber of Physicians in Bremen                                                                             |
| 19 | Ethics Committee of the Friedrich-Alexander-University Erlangen-Nürnberg                                                            |
| 20 | Ethics Committee of the Medical Faculty of the University of Rostock                                                                |
| 21 | Ethics Committee of the State Chamber of Physicians of Rhineland-Palatinate                                                         |
